# Supplementary material for: Hormone Receptor Expression in Meningiomas: A Systematic Review
Source: MDPI journal article supplement (doi:10.3390/cancers15030980), 2023-02-03
Supplement: s1 [file s1]

**Table S1.** All 61 included articles and their bias

\* Intermediate

| <b>Title and author</b>                                                                                                                                                                                                            | <b>Year</b> | <b>Review</b>                                | <b>Bias Type</b> |
|------------------------------------------------------------------------------------------------------------------------------------------------------------------------------------------------------------------------------------|-------------|----------------------------------------------|------------------|
| Li Q. et al. Emerging association between androgen deprivation therapy and male meningioma: significant expression of luteinizing hormone-releasing hormone receptor in male meningioma.                                           | 2013        | Prostate Cancer<br>Prostatic<br>Disease      | Strong           |
| Carroll RS et al. Androgen receptor expression in meningiomas.                                                                                                                                                                     | 1995        | Journal of<br>Neurosurgery                   | Strong           |
| Guevara P. et al. Angiogenesis and expression of estrogen and progesterone receptors as predictive factors for recurrence of meningioma.                                                                                           | 2010        | Journal of<br>Neurooncology                  | Strong           |
| Bozdağ M. et al. Association of apparent diffusion coefficient with Ki-67 proliferation index, progesterone-receptor status and various histopathological parameters, and its utility in predicting the high grade in meningiomas. | 2021        | Acta<br>Radiologica                          | I*               |
| Tao Y. et al. Clinical features and immunohistochemical expression levels of androgen, estrogen, progesterone and Ki-67 receptors in relationship with gross-total resected meningiomas relapse.                                   | 2012        | British Journal<br>of Neurosurgery           | I*               |
| Battu S. et al. Clinicopathological and molecular characteristics of pediatric meningiomas.                                                                                                                                        | 2018        | Neuropathology                               | Strong           |
| Barresi V. et al. Clinicopathological characteristics, hormone receptor status and matrix metallo-proteinase-9 (MMP-9) immunohistochemical expression in spinal meningiomas. Pathol Res Pract.                                     | 2012        | Pathology<br>research and<br>Practice        | Strong           |
| Agaimy A. et al. Comparative study of soft tissue perineurioma and meningioma using a five-marker immunohistochemical panel.                                                                                                       | 2014        | Histopathology                               | Strong           |
| Telugu RB. et al. Estrogen and progesterone receptor in meningiomas: An immunohistochemical analysis.                                                                                                                              | 2020        | Journal of<br>Cancer Research<br>and therapy | I*               |
| Bozzetti C. et al. Estrogen and progesterone receptors in human meningiomas: biochemical and immunocytochemical evaluation.                                                                                                        | 1995        | Surgery<br>Neurology                         | I*               |
| Carroll RS. et al. Expression of a subset of steroid receptor cofactors is associated with progesterone receptor expression in meningiomas.                                                                                        | 2000        | Clinical Cancer<br>Research                  | Strong           |
| Carroll RS et al. Expression of estrogen receptors alpha and beta in human meningiomas.                                                                                                                                            | 1999        | Journal of<br>Neurooncology                  | Strong           |
| Mnango L. et al. Expression of Progesterone Receptor and Its Association with Clinicopathological Characteristics in Meningiomas: A Cross-Sectional Study.                                                                         | 2021        | World<br>Neurosurgery                        | I*               |

|                                                                                                                                                                        |      |                                                       |        |
|------------------------------------------------------------------------------------------------------------------------------------------------------------------------|------|-------------------------------------------------------|--------|
| Schlegel J. et al. Expression of the c-erbB-2-encoded oncoprotein and progesterone receptor in human meningiomas.                                                      | 1993 | Acta Neuropathologica                                 | Strong |
| Ihonen K. et al. Female predominance in meningiomas can not be explained by differences in progesterone, estrogen, or androgen receptor expression.                    | 2006 | Journal of Neurooncology                              | I*     |
| Shahin MN. et al. Fertility treatment is associated with multiple meningiomas and younger age at diagnosis.                                                            | 2019 | Journal of Neurooncology                              | I*     |
| Hirota Y. et al. Gonadotropin-releasing hormone (GnRH) and its receptor in human meningiomas.                                                                          | 2009 | Clinical Neurology and Neurosurgery                   | Strong |
| Lusis EA. et al. High throughput screening of meningioma biomarkers using a tissue microarray.                                                                         | 2005 | Journal of Neurooncology                              | Strong |
| Konstantinidou AE. et al. Hormone receptors in non-malignant meningiomas correlate with apoptosis, cell proliferation and recurrence-free survival.                    | 2003 | Histopathology                                        | Strong |
| Perrot-Appianat M. et al. Immunocytochemical study of progesterone receptor in human meningioma                                                                        | 1992 | Acta Neurochirurgica                                  | Strong |
| Boulagnon-Rombi C. et al. Immunohistochemical Approach to the Differential Diagnosis of Meningiomas and Their Mimics.                                                  | 2017 | Journal of Neuropathology                             | I*     |
| Brandis A. et al. Immunohistochemical detection of female sex hormone receptors in meningiomas: correlation with clinical and histological features.                   | 1993 | Neurosurgery                                          | I*     |
| Gursan N. et al. Immunohistochemical detection of progesterone receptors and the correlation with Ki-67 labeling indices in paraffin-embedded sections of meningiomas. | 2002 | International Journal of Neuroscience                 | I*     |
| Takei H. et al. Immunohistochemical expression of apoptosis regulating proteins and sex hormone receptors in meningiomas..                                             | 2008 | Neuropathology                                        | Strong |
| Leães CGS. et al. Immunohistochemical expression of aromatase and estrogen, androgen and progesterone receptors in normal and neoplastic human meningeal cells.        | 2010 | Neuropathology                                        | I*     |
| Mezmezian MB. et al. Immunohistochemical Expression of Progesterone Receptors in Nonmeningothelial Central Nervous System Tumors.                                      | 2017 | Applied Immunohistochemistry and Molecular Morphology | I*     |
| Khalid H. et al. Immunohistochemical study of estrogen receptor-related antigen, progesterone and estrogen receptors in human intracranial meningiomas.                | 1994 | Cancer                                                | I*     |
| Ipplikcioglu. et al. Is progesteron receptor status really a prognostic factor for intracranial meningiomas?                                                           | 2014 | Clinical Neurological Neurosurgery                    | Strong |
| Heß K. et al. Brain Invasion in Meningiomas-Sex-Associated Differences are not Related to Estrogen- and Progesterone Receptor Expression.                              | 2017 | Neurosurgery                                          | Strong |
| Ülgen E. et al. Meningiomas Display a Specific Immunoexpression Pattern in a Rostrocaudal Gradient: An Analysis of 366 Patients.                                       | 2019 | World Neurosurgery                                    | I*     |

|                                                                                                                                                                                                                                 |      |                                                    |        |
|---------------------------------------------------------------------------------------------------------------------------------------------------------------------------------------------------------------------------------|------|----------------------------------------------------|--------|
| Lusis EA. et al. Meningiomas in pregnancy: a clinicopathologic study of 17 cases.                                                                                                                                               | 2012 | Neurosurgery                                       | Strong |
| Maiuri F. et al. Meningiomas in Premenopausal Women: Role of the Hormone Related Conditions.                                                                                                                                    | 2020 | Frontiers in Oncology                              | I*     |
| Perry A. et al. Merlin, DAL-1, and progesterone receptor expression in clinicopathologic subsets of meningioma: a correlative immunohistochemical study of 175 cases.                                                           | 2000 | Journal of Neuropathology & Experimental Neurology | I*     |
| Ichimura S. et al. Molecular investigation of brain tumors progressing during pregnancy or postpartum period: the association between tumor type, their receptors, and the timing of presentation.                              | 2021 | Clinical Neurological Neurosurgery                 | Strong |
| Portet S. et al. New Insights into Expression of Hormonal Receptors by Meningiomas.                                                                                                                                             | 2020 | World Neurosurgery                                 | Strong |
| Domínguez-Malagón HR. et al. Perineurioma versus meningioma. A multi-institutional immunohistochemical and ultrastructural study.                                                                                               | 2021 | Ultrastructural Pathology                          | Strong |
| Hsu DW. et al. Progesterone and estrogen receptors in meningiomas: prognostic considerations.                                                                                                                                   | 1997 | Journal of Neurosurgery                            | Strong |
| Pravdenkova. et al. Progesterone and estrogen receptors: opposing prognostic indicators in meningiomas.                                                                                                                         | 2006 | Journal of Neurosurgery                            | I*     |
| Carroll RS. et al. Progesterone receptor expression in meningiomas.                                                                                                                                                             | 1993 | Cancer Research                                    | Strong |
| Kuroi Y. et al. Progesterone Receptor Is Responsible for Benign Biology of Skull Base Meningioma.                                                                                                                               | 2018 | World Neurosurgery                                 | I*     |
| Wolfsberger S. et al. Progesterone-receptor index in meningiomas: correlation with clinico-pathological parameters and review of the literature.                                                                                | 2004 | Neurosurgery Review                                | I*     |
| Hua L. et al. Prognostic value of estrogen receptor in WHO Grade III meningioma: a long-term follow-up study from a single institution.                                                                                         | 2018 | Journal of Neurosurgery                            | I*     |
| Bouillot P. et al. Quantitative imaging of estrogen and progesterone receptors, estrogen-regulated protein, and growth fraction: immunocytochemical assays in 52 meningiomas. Correlation with clinical and morphological data. | 1994 | Journal of Neurosurgery                            | Strong |
| Abdelzaher E. et al. Recurrence of benign meningiomas: predictive value of proliferative index, BCL2, p53, hormonal receptors and HER2 expression.                                                                              | 2011 | British Journal of Neurosurgery                    | Strong |
| de Carvalho GTC. et al. Recurrence/Regrowth in Grade I Meningioma: How to Predict?                                                                                                                                              | 2020 | Frontiers in Oncology                              | I*     |
| Probst-Cousin S. et al. Secretory meningioma: clinical, histologic, and immunohistochemical findings in 31 cases.                                                                                                               | 2003 | Cancer                                             | Strong |
| Buhl R. et al. Secretory meningiomas: clinical and immunohistochemical observations.                                                                                                                                            | 2001 | Neurosurgery                                       | Strong |
| Baxter DS et al. An audit of immunohistochemical marker patterns in meningioma.                                                                                                                                                 | 2014 | Journal of Clinical Neuroscience                   | I*     |

|                                                                                                                                                                                                                            |      |                                                                                                |        |
|----------------------------------------------------------------------------------------------------------------------------------------------------------------------------------------------------------------------------|------|------------------------------------------------------------------------------------------------|--------|
| Roser F. The prognostic value of progesterone receptor status in meningiomas.                                                                                                                                              | 2004 | Journal of Clinical Pathology                                                                  | I*     |
| Claus EB, Park PJ. Specific genes expressed in association with progesterone receptors in meningioma.                                                                                                                      | 2008 | Cancer research                                                                                | Strong |
| Smith JS. Sex steroid and growth factor profile of a meningioma associated with pregnancy.                                                                                                                                 | 2005 | Canadian Journal of Neurological Sciences                                                      | Strong |
| Hatiboglu MA. Sex steroid and epidermal growth factor profile of giant meningiomas associated with pregnancy. Surg Neurol.                                                                                                 | 2008 | Surgical Neurology                                                                             | Strong |
| Nagashima, G et al. Immunohistochemical detection of progesterone receptors and the correlation with Ki-67 labeling indices in paraffin-embedded sections of meningiomas.                                                  | 1995 | Neurosurgery                                                                                   | Strong |
| Schulz, S et al. Immunohistochemical determination of five somatostatin receptors in meningioma reveals frequent overexpression of somatostatin receptor subtype sst2A.                                                    | 2000 | Clinical cancer research : an official journal of the American Association for Cancer Research | Strong |
| Menke, Joshua R et al. Somatostatin receptor 2a is a more sensitive diagnostic marker of meningioma than epithelial membrane antigen.                                                                                      | 2015 | Acta neuro pathologica                                                                         | I*     |
| Körner, Meike et al. Value of immunohistochemistry for somatostatin receptor subtype sst2A in cancer tissues: lessons from the comparison of anti-sst2A antibodies with somatostatin receptor autoradiography.             | 2005 | The American journal of surgical pathology                                                     | I*     |
| Lazow, Margot A et al. Immunohistochemical assessment and clinical, histopathologic, and molecular correlates of membranous somatostatin type-2A receptor expression in high-risk pediatric central nervous system tumors. | 2022 | Frontiers in oncology                                                                          | I*     |
| Behling, Felix et al. Differences in the expression of SSTR1-5 in meningiomas and its therapeutic potential                                                                                                                | 2022 | Neurosurgical review                                                                           | I*     |
| Silva, Camila Batista de Oliveira et al. "Expression of somatostatin receptors (SSTR1-SSTR5) in meningiomas and its clinicopathological significance.                                                                      | 2015 | International journal of clinical and experimental pathology                                   | Strong |
| Barresi, V et al. Sstr2A immunohistochemical expression in human meningiomas: is there a correlation with the histological grade, proliferation or microvessel density?                                                    | 2008 | Oncology reports                                                                               | Strong |
